# Supplementary material for: Facile dimethylarsenic exchange and pyramidal inversion in its cysteine and glutathione adducts
Source: Royal Society of Chemistry journal article supplement (doi:10.1039/c3ob40268a), 2013-01-01
Supplement: c3ob40268a.pdf [file c3ob40268a.pdf]

## Facile dimethylarsenic exchange and pyramidal inversion in its cysteine and glutathione adducts.

D. Scott Bohle,<sup>\*†‡</sup> and Yuxuan Gu<sup>‡</sup>

### Supplementary Material.

|                                                                                     |                                                                                                                                                                                                                                                                                       |
|-------------------------------------------------------------------------------------|---------------------------------------------------------------------------------------------------------------------------------------------------------------------------------------------------------------------------------------------------------------------------------------|
| 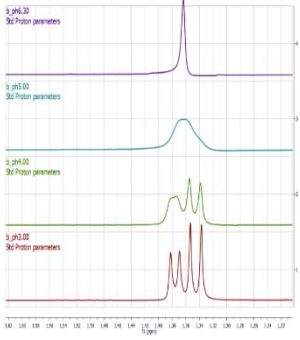  | <p>Biologically relevant dimethyl arsenic (III) species are shown to have labile As-S bonds, we attempted to measure the kinetics of this interaction using dynamic NMR and proposed mechanisms for this interaction. Implications to arsenic drug therapy and arsenic poisoning.</p> |
|  | <p>Diastereotopic methyls dimethylarsinocysteine are found to coalesce on the NMR, implying possible bond lability</p>                                                                                                                                                                |

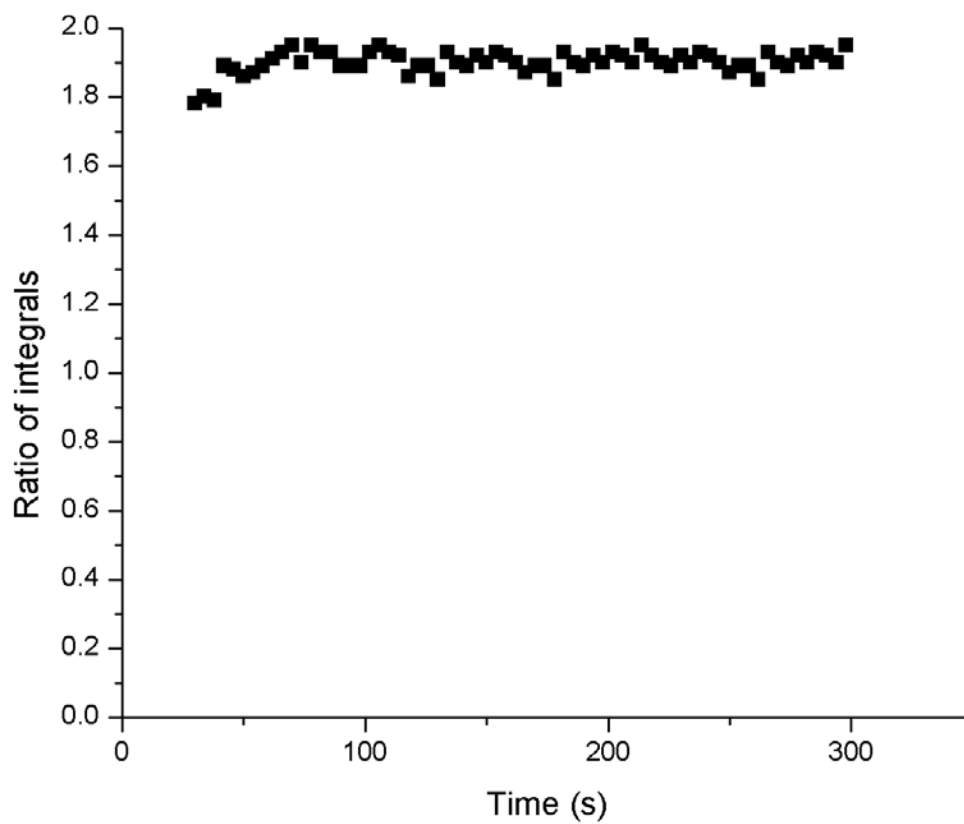

Fig1. Ratio of methyl peaks for **1** and **2** after an addition of 200 ml of 10mM solution of GSH to a 400 ul solution of **2** at pD= 4.6, 22 °C

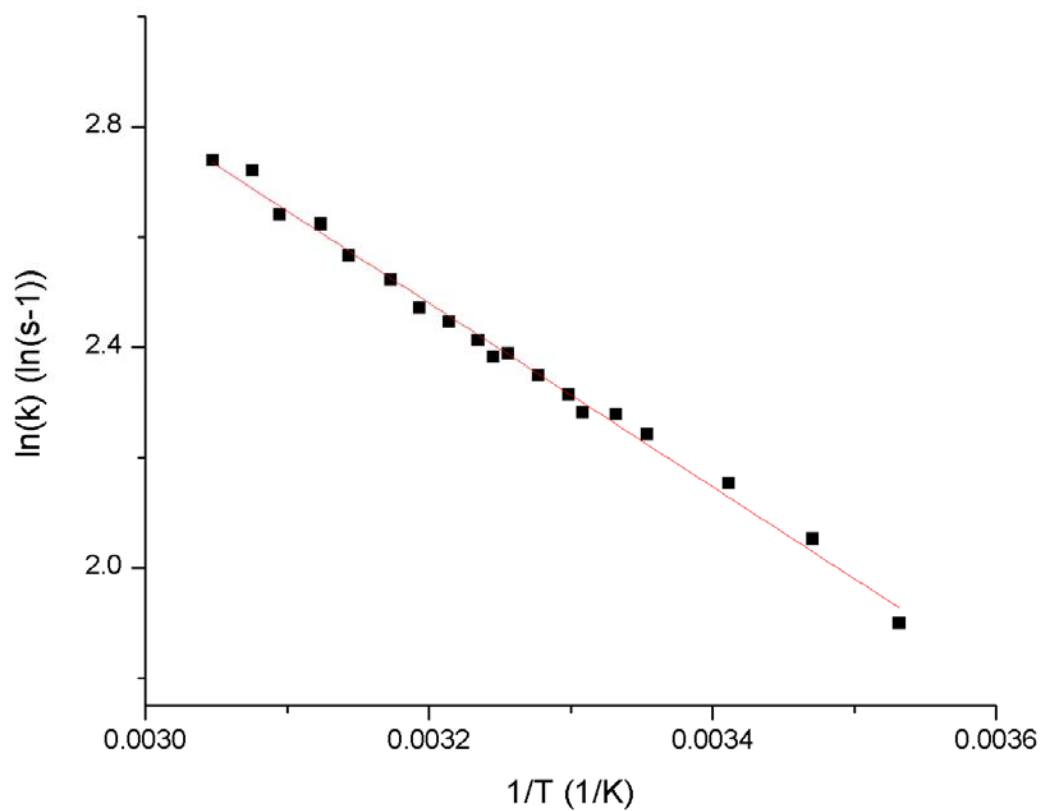

Fig. 2 Arrhenius plot of the natural log of the rate constant ( $\ln(k)$ ) against  $1/$  Temperature ( $1/K$ ) with the linear fit ( $y = -1666x + 7.8$ ) The derived parameters are  $\Delta G^\ddagger = 73 \text{ kJmol}^{-1}$ ,  $\Delta H^\ddagger = 11 \text{ kJmol}^{-1}$  and  $\Delta S^\ddagger = -190 \text{ Jmol}^{-1}\text{K}^{-1}$ .

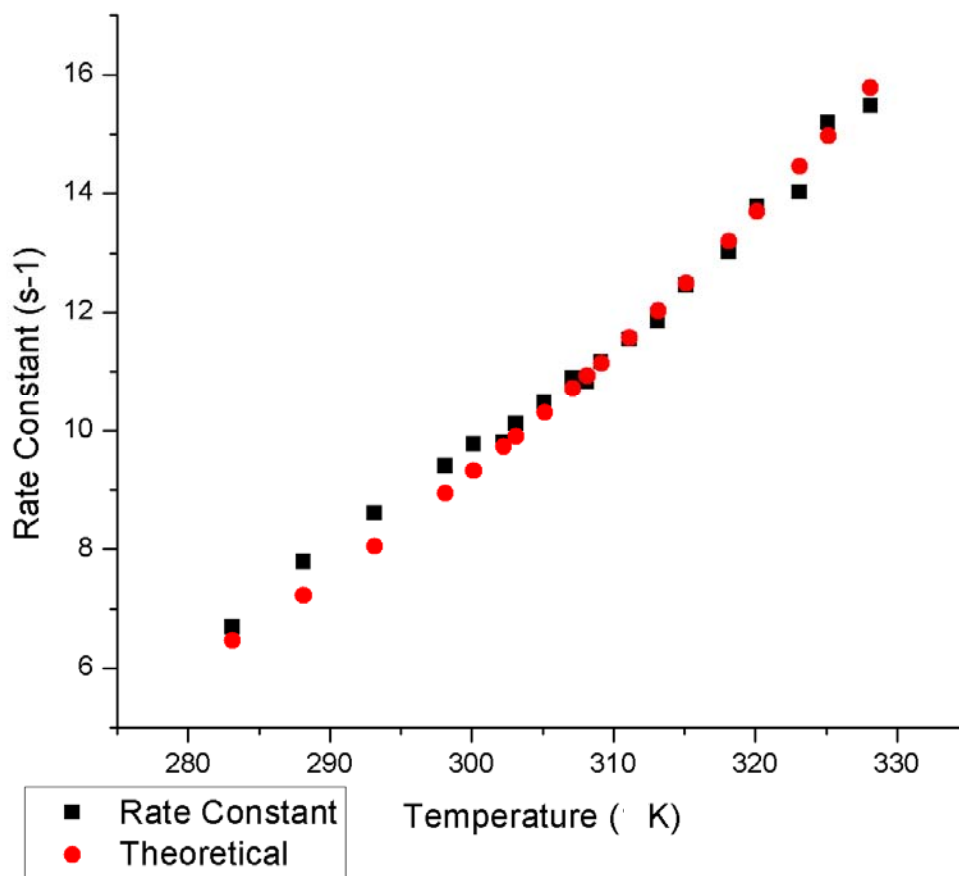

Fig 3. Chart showing the experimental and the data fitted (Eyring equation) rate constant against temperature with  $\Delta G^\ddagger = 73 \text{ kJmol}^{-1}$ ,  $\Delta H^\ddagger = 11 \text{ kJmol}^{-1}$  and  $\Delta S^\ddagger = -190 \text{ Jmol}^{-1}\text{K}^{-1}$ .
